# Supplementary material for: Clinical Manifestations in a Girl with NAA10-Related Syndrome and Genotype–Phenotype Correlation in Females
Source: MDPI journal article supplement (doi:10.3390/genes12060900), 2021-06-10
Supplement: s1 [file s1]

**Table S2.** Summary of clinical features in females with the most common *NAA10* variant (*p.Arg83Cys*).

|                     | ID | Inheritance,X-inact. | Age     | Facial Dys-morphism                                                                            | micro-cephaly | Short stature | Neurodevelopment                                                                        | hypo/hypertonia | Brain imaging anomalies                             | Feeding difficulties | Cardiac anomalies                    | Eye abnormalities                                 | Skeletal system abnormalities                             | Others                     |
|---------------------|----|----------------------|---------|------------------------------------------------------------------------------------------------|---------------|---------------|-----------------------------------------------------------------------------------------|-----------------|-----------------------------------------------------|----------------------|--------------------------------------|---------------------------------------------------|-----------------------------------------------------------|----------------------------|
| Saunier et al. 2016 | 1  | De novo, random      | 4y 2mo  | NA                                                                                             | -3.5 SD       | yes           | Severe DD, absent speech                                                                | hypo            | no                                                  | yes                  | no                                   | no                                                | no                                                        | no                         |
|                     | 2  | de novo, 92%         | 4y 3mo  | NA                                                                                             | -3.59 SD      | yes           | DD (not walking at 3y 6mo, severe language delay), aggressivity                         | hypo            | hyppocampic dys-genesis                             | no                   | no                                   | no                                                | no                                                        | no                         |
|                     | 3  | de novo, NA          | 2y 2mo  | prominent forehead, up-lifted ear lobes, narrow palate                                         | -3.86 SD      | yes           | severe DD (not walking yet and absent speech)                                           | hypo            | periventricular white matter loss                   | yes                  | mild PAS, PFO vs. ASD                | myopia, astigmatism                               | large fontanels, super-numerary vertebra, dysmorphic L1   | no                         |
|                     | 4  | de novo, NA          | 3y 10mo | NA                                                                                             | -4.85 SD      | yes           | severe DD (not walking yet and absent speech)                                           | hypo/hyper      | IVH occipital horn, PVL, HIE                        | yes                  | no                                   | alternating esotropia, cortical visual impairment | large fontanels, small hands and feet, thoracic anomalies | VP shunt                   |
|                     | 5  | de novo, NA          | 10y6mo  | bitemporal narrowing, arched eyebrows, synophrys, up-turned nose, uplifted earlobes, hirsutism | -2.8 SD       | yes           | DD (walking at 3y), moderate ID, very active, problem in new sitting                    | hypo            | no                                                  | mild                 | long QT                              | astigmatism, hyperopia                            | large fontanels, mild pectus excavatum                    | cutis marmorata            |
|                     | 6  | de novo, 100%        | 4y      | arched eyebrows, up-turned nose                                                                | no            | no            | severe DD (walking at 2y, absent speech), hyperactivity, poor eye contact, aggressivity | no              | NA                                                  | yes                  | incomplete right bundle branch block | hyperopia                                         | clinodactily V, pectus excavatum                          | sleeping problem           |
|                     | 7  | MGM, NA              | 6y 6mo  | prominent forehead, bitemporal narrowing, arched eyebrows, up-turned nose                      | -4.85 SD      | yes           | Severe ID (not walking yet and absent speech), attention deficit, restlessness          | periph hyper    | NA                                                  | NA                   | no                                   | myopia, megalopapillae                            | small hands and feet, tapering fingers, pectus excavatum  | cutis marmorata            |
| Sidhu et al. 2017   | 8  | de novo, NA          | 13y     | frontal bossing, bitemporal narrowing, low set ears, coarse                                    | NA            | NA            | DD (walking with assistance at 25mo), severe ID, autism spectrum disorder               | hypo            | white matter volume loss, thin CC, ventriculomegaly | no                   | no                                   | no                                                | broad big toes                                            | seizures, hyper-somnolence |

|                         |                             |                |            |                                                                                   |     |     |                                                                                          |                |                                                          |                                                                                                               |                                   |                                                                                     |                       |                                                                            |
|-------------------------|-----------------------------|----------------|------------|-----------------------------------------------------------------------------------|-----|-----|------------------------------------------------------------------------------------------|----------------|----------------------------------------------------------|---------------------------------------------------------------------------------------------------------------|-----------------------------------|-------------------------------------------------------------------------------------|-----------------------|----------------------------------------------------------------------------|
| Cheng<br>et al.<br>2019 | face, high<br>arched palate |                |            |                                                                                   |     |     |                                                                                          |                |                                                          |                                                                                                               |                                   |                                                                                     |                       |                                                                            |
|                         | 9                           | de novo,<br>NA | 10y        | no                                                                                | no  | yes | Global DD, severe ID,<br>autistic traits,<br>apraxia, poor fine<br>motor skills          | hypo/<br>hyper | no                                                       | functional<br>bulbar<br>palsy,<br>esophagus<br>and gut dys-<br>motility<br>syndrome,<br>complete<br>dysphagia | no                                | cortical visual<br>impairment, bi-<br>lateral astigma-<br>tism, divergent<br>squint | kyphosis              | severe sleep<br>disorder, bi-<br>lateral tali-<br>pes, hyper-<br>trichosis |
|                         | 10                          | de novo,<br>NA | 13y        | coarse face, syn-<br>ophris, large<br>nose                                        | no  | no  | severe DD (very lim-<br>ited speech, poor fine<br>motor skills)                          | no             | white matter loss,<br>thin CC, promi-<br>nent CSF spaces | PEG feeding                                                                                                   | long QT, bi-<br>cuspide<br>valve  | astigmatism                                                                         | pectus excava-<br>tum | absence sei-<br>zures, prem-<br>ature preco-<br>cious pu-<br>berty         |
|                         | 11                          | de novo,<br>NA | 11y<br>6mo | micrognathia                                                                      | no  | no  | global DD (poor fine<br>motor skills, absent<br>speech), ID, autism<br>spectrum disorder | no             | small cyst                                               | PEG feed-<br>ing, GI dis-<br>motility, cy-<br>clical vomit-<br>ing, food in-<br>tolerance                     | NA                                | cortical visual<br>impairment                                                       | no                    | moderate<br>hearing im-<br>pairment,<br>precocious<br>puberty              |
|                         | 12                          | de novo,<br>NA | 34y        | yes                                                                               | no  | no  | global DD, severe ID                                                                     | hyper          | NA                                                       | excessive<br>vomiting,<br>GE reflux,<br>coeliac dis-<br>ease                                                  | no                                | NA                                                                                  | no                    | epilepsy,<br>sleep dis-<br>turbance                                        |
|                         | 13                          | de novo,<br>NA | 13y        | no                                                                                | no  | no  | global DD, learning<br>disability, autistic<br>traits, pica                              | no             | NA                                                       | gut dis-<br>motility,<br>food intoler-<br>ance                                                                | long QT                           | astigmatism, hy-<br>peropia                                                         | no                    | cutis mar-<br>morata                                                       |
|                         | 14                          | de novo,<br>NA | 15y        | no                                                                                | no  | no  | global DD,<br>severe ID,<br>autism spectrum dis-<br>order                                | no             | NA                                                       | NA                                                                                                            | tetralogy of<br>Fallot            | NA                                                                                  | no                    | no                                                                         |
|                         | 15                          | de novo,<br>NA | 7y<br>6mo  | bitemporal nar-<br>rowing, arched<br>eyebrows, syn-<br>ophris, up-<br>turned nose | yes | yes | global DD,<br>severe ID                                                                  | yes            | intracranial hem-<br>orrhage,<br>ventriculomegaly        | yes                                                                                                           | no                                | cortical visual<br>impairment,<br>astigmatism                                       | no                    | partial epi-<br>lepsy, VP<br>shunt                                         |
|                         | 16                          | de novo,<br>NA | 1y<br>2mo  | yes                                                                               | no  | no  | global DD                                                                                | no             | no                                                       | yes                                                                                                           | secundum<br>ASD, mild<br>valvular | NA                                                                                  | no                    | bilateral<br>hearing loss                                                  |

|          |    |                 |        |                                                                                                                                                                                           |      |       |                                                                         |                           |                                                                             |                |                                                        |                                                                                      |                                                                                      |                                                                        |
|----------|----|-----------------|--------|-------------------------------------------------------------------------------------------------------------------------------------------------------------------------------------------|------|-------|-------------------------------------------------------------------------|---------------------------|-----------------------------------------------------------------------------|----------------|--------------------------------------------------------|--------------------------------------------------------------------------------------|--------------------------------------------------------------------------------------|------------------------------------------------------------------------|
|          |    |                 |        |                                                                                                                                                                                           |      |       |                                                                         |                           |                                                                             |                | pulmonary stenosis, dilated right atrial and ventricle |                                                                                      |                                                                                      |                                                                        |
|          | 17 | de novo, NA     | 6y     | yes                                                                                                                                                                                       | no   | yes   | global DD, behavioural issues                                           | no                        | NA                                                                          | yes            | long QT                                                | NA                                                                                   | extra rib, extra vertebrae                                                           | seizures                                                               |
|          | 18 | de novo, NA     | 2y 6mo | yes                                                                                                                                                                                       | no   | yes   | global DD                                                               | mild hypo                 | NA                                                                          | yes, GE reflux | NA                                                     | astigmatism                                                                          | no                                                                                   | no                                                                     |
|          | 19 | de novo, NA     | 7y     | yes                                                                                                                                                                                       | yes  | yes   | global DD, severe ID, autism spectrum disorder                          | mild hypo, cerebral palsy | central white matter loss, thin CC                                          | yes            | NA                                                     | astigmatism, myopia                                                                  | no                                                                                   | no                                                                     |
| Our Case | 20 | de novo, NA     | 18y    | mild coarse face, bitemporal narrowing, arched thick eyebrows, long eyelashes, synophrys, broad tip, anteverted nares, smooth long philtrum, thin upper lip, mild low-set ears, hirsutism |      |       | severe DD (walking at 30 mo, absent speech), severe ID, autistic traits | hypo                      | cerebellar and frontal lobe atrophy, thin CC, large frontal horn ventricles | no             | VSD, mild to moderate hypertrophic cardio-myopathy     | myopia, astigmatism, slightly pale and broad optic disc, central colobomatous defect | large fontanels, wormian bones, hip dysplasia, delayed bone age, scoliosis, Kyphosis | Lennox-Gastaut epilepsy, sensorial neuropathy, conductive hearing loss |
|          |    |                 |        |                                                                                                                                                                                           |      |       |                                                                         |                           |                                                                             |                |                                                        |                                                                                      |                                                                                      |                                                                        |
| Total    | 20 | 19/20 (de novo) |        | 14/20                                                                                                                                                                                     | 9/20 | 12/20 | 20/20                                                                   | 9/20 (hypo)               | 9/20                                                                        | 15/20          | 9/20                                                   | 13/20                                                                                | 10/20                                                                                |                                                                        |

ASD, atrial septal defect; CC, *corpus callosum*; CSF, cerebrospinal fluid; DD, developmental delay; ID intellectual disability; HIE, hypoxic-ischemic encephalopathy; IVH, intraventricular hemorrhage ; MGM, maternal germline; NA, not available; PAS, pulmonary artery stenosis; PEG, percutaneous endoscopic gastrostomy; PFO, patent foramen ovale; PVL periventricular leukomalacia; VP ventriculo-peritoneal; VSD, ventricular septal defect.
