# Supplementary material for: Clinical Manifestations in a Girl with NAA10-Related Syndrome and Genotype–Phenotype Correlation in Females
Source: MDPI journal article supplement (doi:10.3390/genes12060900), 2021-06-10
Supplement: s1 [file s1]

**Table S1.** Summary of molecular findings and clinical features in females with *NAA10* variants.

| Reference               | Cheng et al. 2019                    | Bader et al. 2020               | Saunier et al. 2016, Sidhu et al. 2017, Cheng et al. 2019<br>Our case                       | Cheng et al. 2019    | Cheng et al. 2019                    | Popp et al. 2015                    | McTiernan et al. 2018                                  | Saunier et al. 2016                       | Cheng et al. 2019              | Thevenon et al. 2016                           | Saunier et al. 2016, Cheng et al. 2019         | Cheng et al. 2019                         | Total                  |
|-------------------------|--------------------------------------|---------------------------------|---------------------------------------------------------------------------------------------|----------------------|--------------------------------------|-------------------------------------|--------------------------------------------------------|-------------------------------------------|--------------------------------|------------------------------------------------|------------------------------------------------|-------------------------------------------|------------------------|
| <i>NAA10</i> mutation   | Leu11Arg                             | His16Pro                        | Arg83Cys                                                                                    | Ala87Ser             | Ala104Asp                            | Val107Phe                           | Val111Gly                                              | Arg116Trp                                 | Leu121Val                      | Phe128Ile                                      | Phe128Leu                                      | Met147Thr                                 | 12                     |
| CADD score              | 32                                   | 28.6                            | 28.9                                                                                        | 25.4                 | 27.6                                 | 26.1                                | 28.3                                                   | 24.3                                      | 25.8                           | 27.9                                           | 23.4                                           | 24.0                                      |                        |
| Functional studies      | reduction in NatA catalytic activity | impaired NatA complex formation | clear reduction (60%) in catalytic activity; enhance catalytic activity (Cheng et al. 2019) | NA                   | reduction in NatA catalytic activity | nearly abolished enzymatic activity | decreased stability, NatA catalytic activity unchanged | very mild reduction in catalytic activity | NA                             | decreased stability, near loss activity (>90%) | decreased stability, near loss activity (>90%) | very mild reduction in catalytic activity |                        |
| Patients                | 1                                    | 1                               | 20                                                                                          | 3                    | 1                                    | 1                                   | 1                                                      | 1                                         | 2                              | 1                                              | 3                                              | 1                                         | 36                     |
| Inheritance             | NA                                   | <i>de novo</i>                  | <i>de novo</i> (19/20), MGM (1/20)                                                          | <i>de novo</i> (3/3) | <i>de novo</i>                       | <i>de novo</i>                      | <i>de novo</i>                                         | <i>de novo</i>                            | <i>de novo</i> (1/2), NA (1/2) | <i>de novo</i>                                 | <i>de novo</i>                                 | <i>de novo</i>                            | <i>de novo</i> (33/36) |
| X-inactivation          | NA                                   | skewed                          | random (1/20), NA (17/20), 92% (1/20), 100% (1/20)                                          | NA (3/3)             | NA                                   | random                              | random                                                 | random                                    | NA(2/2)                        | random                                         | random (1/3), NA (2/3)                         | NA                                        |                        |
| Feeding difficulties    |                                      |                                 | 14/20                                                                                       | 2/3                  | +                                    |                                     |                                                        |                                           | 1/2                            |                                                | 1/3                                            | +                                         | 20/36                  |
| Short stature           |                                      | +                               | 10/20                                                                                       | 1/3                  |                                      | +                                   |                                                        |                                           | 1/2                            | +                                              | 2/3                                            |                                           | 17/36                  |
| Microcephaly            |                                      | +                               | 11/20                                                                                       |                      |                                      | +                                   |                                                        |                                           |                                |                                                | 1/3                                            | +                                         | 15/36                  |
| Facial Dysmorphism      |                                      | +                               | 14/20                                                                                       | 2/3                  |                                      | +                                   |                                                        |                                           | 1/2                            | +                                              | 2/3                                            |                                           | 22/36                  |
| NDD/ ID                 | +                                    | +                               | 20/20                                                                                       | 3/3                  | +                                    | +                                   | +                                                      | +                                         | 2/2                            | +                                              | 3/3                                            | +                                         | 36/36                  |
| Seizures                |                                      |                                 | 5/20                                                                                        | 2/3                  |                                      |                                     |                                                        |                                           |                                |                                                | 2/3                                            |                                           | 9/36                   |
| Muscular hypotonia      |                                      | +                               | 10/20                                                                                       | 2/3                  |                                      | +                                   |                                                        | +                                         | 1/2                            | +                                              | 1/3                                            |                                           | 18/36                  |
| Neuropathy              |                                      |                                 | 1/20                                                                                        |                      |                                      |                                     |                                                        |                                           |                                |                                                |                                                |                                           | 1/36                   |
| Movement disorder       |                                      |                                 | 4/20                                                                                        | 1/3                  | +                                    |                                     |                                                        |                                           |                                |                                                | 1/3                                            |                                           | 7/36                   |
| Brain imaging anomalies | +                                    | +                               | 9/20                                                                                        | 2/3                  |                                      | +                                   | (mild)                                                 | +                                         | (thin CC, dilated LV)          | +                                              | 3/3                                            | +                                         | 20/36                  |
| NDD                     |                                      | autism                          | 8/20 autism                                                                                 | 1/3 (autism, ADHD)   | autism, ADHD                         | autism                              |                                                        | ADHD, DCD                                 | 1/2 autism                     |                                                |                                                |                                           | 15/36                  |

|                                    |   |   |                |     |                |                                         |  |         |     |       |
|------------------------------------|---|---|----------------|-----|----------------|-----------------------------------------|--|---------|-----|-------|
| Behavioural abnormalities          |   |   | 7/20           |     |                | +                                       |  | 1/2     |     | 9/36  |
| Cardiac anomalies                  |   |   | 10/20          |     |                | +                                       |  | +       | +   | 14/36 |
| Eye abnormalities                  | + | + | 14/20          | 1/3 | +              | +                                       |  | 1/2     | 1/3 | 22/36 |
| Genitourinary system abnormalities |   |   | 2/20           |     |                |                                         |  |         |     | 2/36  |
| Skeletal system abnormalities      |   | + | 10/20          | 1/3 | +              | + (large fontanelles, delayed bone age) |  | 1/2     | 1/3 | 16/36 |
| Ear abnormalities                  |   |   | 3/20           | 1/3 | +              |                                         |  |         |     | 5/36  |
| GI tract abnormalities             |   |   | 5/20           |     |                |                                         |  |         |     |       |
| Skin abnormalities                 |   |   | 4/20           |     |                |                                         |  |         |     | 4/36  |
| Other                              |   |   | sleep disorder |     | sleep disorder |                                         |  | bruxism |     |       |
